# Supplementary material
Source: publisher figshare collection journal article supplement (https://karger.figshare.com/ndownloader/files/30726029)
Supplement: Supplementary file 1 [file 30726029]

**Table S1. Intra- and inter-assay coefficients of variation for the Inflammation Marker Measurement**

|  | **Inter-assay CV** | **Intra-assay CV** |
| --- | --- | --- |
| CXCL16 | 13% | 0.19% - 2.99% |
| IL-6 | 10% | 0.41% - 4.26% |
| TNF-α | 9% | 0.16% - 4.14% |
| CRP | 15% | 0.01% - 5.73% |

**Table S2.** **Multivariate Cox Regressions for the Association of Inflammatory Markers with All-Cause Mortality**

| **Biomarkers** | **Tertiles** | **HR*** | **95% CI** | ***p*** |
| --- | --- | --- | --- | --- |
| **CXCL16** | *Low* | *Ref* | -- | -- |
| *Medium* | 1.40 | 0.66 – 2.97 | 0.378 |
| *High* | 2.81 | 1.41 – 5.59 | 0.003 |
|  | | | | |
| **IL-6** | *Low* | *Ref* | -- | -- |
| *Medium* | 1.35 | 0.59 – 3.08 | 0.481 |
| *High* | 1.73 | 0.80 – 3.74 | 0.165 |
|  | | | | |
| **TNF-α** | *Low* | *Ref* | -- | -- |
| *Medium* | 1.21 | 0.60 – 2.47 | 0.591 |
| *High* | 1.59 | 0.81 – 3.12 | 0.176 |
|  | | | | |
| **CRP** | *Low* | *Ref* | -- | -- |
| *Medium* | 1.25 | 0.61 – 2.59 | 0.540 |
| *High* | 1.64 | 0.80 – 3.40 | 0.180 |

* Models adjusted for age, sex, body mass index, diabetes, systolic blood pressure, hemoglobin, albumin, low-density lipoprotein and previous cardiovascular disease.

**Table S3. Multivariate Cox Regressions for the Association of Inflammatory Markers with Major Adverse Cardiovascular Events**

| **Biomarkers** | **Tertiles** | **HR*** | **95% CI** | ***p*** |
| --- | --- | --- | --- | --- |
| **CXCL16** | *Low* | *Ref* | -- | -- |
| *Medium* | 2.01 | 0.86 – 4.65 | 0.105 |
| *High* | 4.03 | 1.76 – 9.20 | 0.001 |
|  | | | | |
| **IL-6** | *Low* | *Ref* | -- | -- |
| *Medium* | 1.46 | 0.63 – 3.39 | 0.376 |
| *High* | 1.71 | 0.75 – 3.85 | 0.199 |
|  | | | | |
| **TNF-α** | *Low* | *Ref* | -- | -- |
| *Medium* | 0.82 | 0.40 – 1.68 | 0.589 |
| *High* | 1.00 | 0.50 – 2.00 | 0.994 |
|  | | | | |
| **CRP** | *Low* | *Ref* | -- | -- |
| *Medium* | 0.71 | 0.34 – 1.48 | 0.364 |
| *High* | 1.20 | 0.58 – 2.48 | 0.629 |

* Models adjusted for age, sex, body mass index, diabetes, systolic blood pressure, hemoglobin, albumin, low-density lipoprotein and previous cardiovascular disease.

**Table S4. Multivariate Cox Regressions for the Associations of CXCL16 with Outcomes Including Cardiac Injury Markers as Covariates**

|  | **All-Cause Mortality** | | | **MACE** | | |
| --- | --- | --- | --- | --- | --- | --- |
| **HR** | **95% CI** | ***p*** | **HR** | **95% CI** | ***p*** |
| **Model-1** | 11.39 | 2.95 – 44.02 | <0.001 | 7.84 | 1.46 – 42.13 | 0.016 |
| **Model-2** | 9.49 | 2.40 – 37.56 | 0.001 | 9.30 | 1.82 – 47.61 | 0.007 |
| **Model-3** | 11.29 | 2.88 – 44.34 | <0.001 | 7.92 | 1.47 – 42.64 | 0.016 |

Model-1: Adjusted for age, sex, body mass index, diabetes, systolic blood pressure, hemoglobin, albumin, low-density lipoprotein, previous cardiovascular disease and Troponin T (log-transformed).

Model-2: Adjusted for age, sex, body mass index, diabetes, systolic blood pressure, hemoglobin, albumin, low-density lipoprotein, previous cardiovascular disease and NT-proBNP (log-transformed).

Model-3: Model-1 + NT-proBNP (log-transformed).
